# Supplementary material for: Syntheses, structures, and magnetic properties of six coordination polymers based on 4,5-di(4′-carboxylphenyl)phthalic acid and different bis(imidazole) bridging linkers
Source: Royal Society of Chemistry journal article supplement (doi:10.1039/c4ce00760c), 2014-01-01
Supplement: c4ce00760c1.pdf [file c4ce00760c1.pdf]

*Electronic Supplementary Information (ESI) for*

**Syntheses, Structures, and Magnetic Properties of Six Coordination Polymers Based  
on 4,5-Di(4'-carboxylphenyl)phthalic Acid and Different Bis(imidazole) Bridging  
Linkers**

Liming Fan,<sup>a</sup> Yan Gao,<sup>b</sup> Guangzeng Liu,<sup>b</sup> Weiliu Fan,<sup>a</sup> Weikuo Song,<sup>b</sup> Liming Sun,<sup>a</sup> Xian Zhao,<sup>\*a</sup> Xiutang Zhang<sup>\*a,b</sup>

<sup>a</sup>State Key Laboratory of Crystal Materials, Shandong University, Jinan 250100, China. <sup>b</sup>Advanced Material Institute of

Research, College of Chemistry and Chemical Engineering, Qilu Normal University, Jinan, 250013, China.

E-mail: xiutangzhang@163.com; zhaoxian@icm.sdu.edu.cn.

ESI

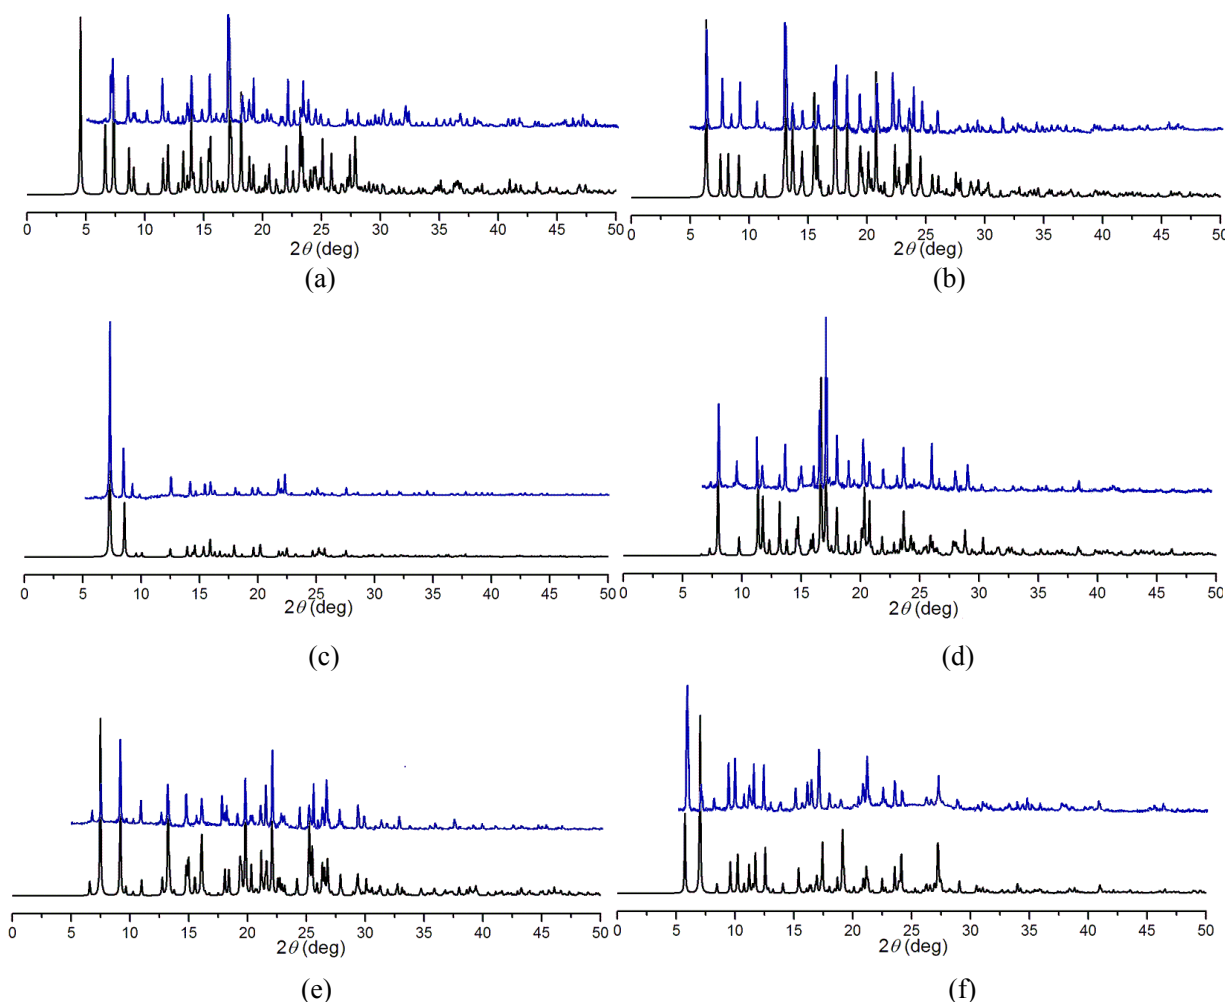

**Figure S1.** PXRD patterns of **1** (a), **2** (b), **3** (c), **4** (d), **5** (e) and **6** (f). Dark: calculated from the X-ray single-crystal data; Blue: observed for the as-synthesized solids.

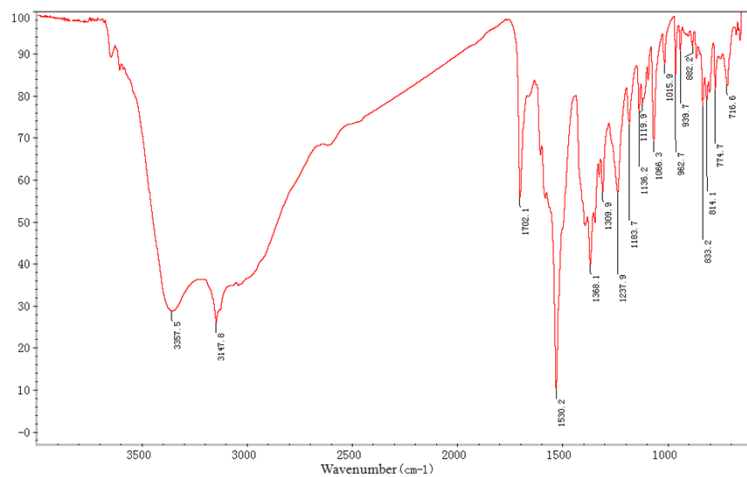

(a)

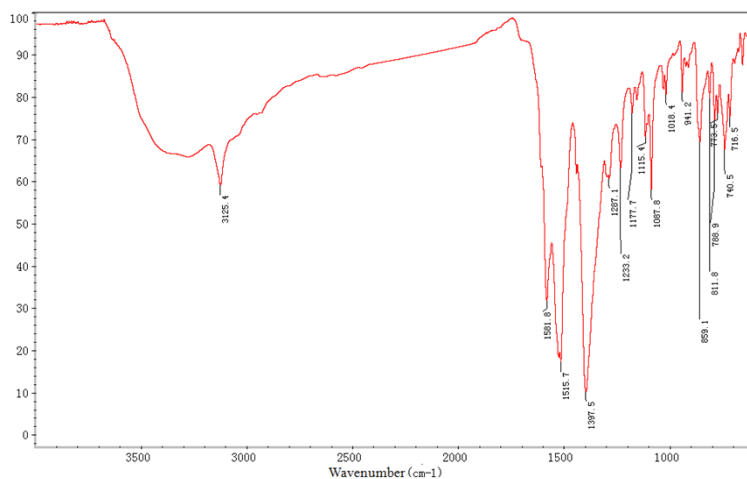

(b)

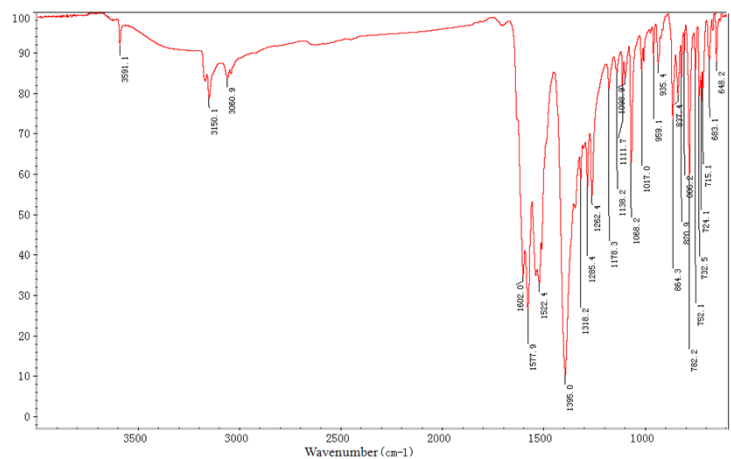

(c)

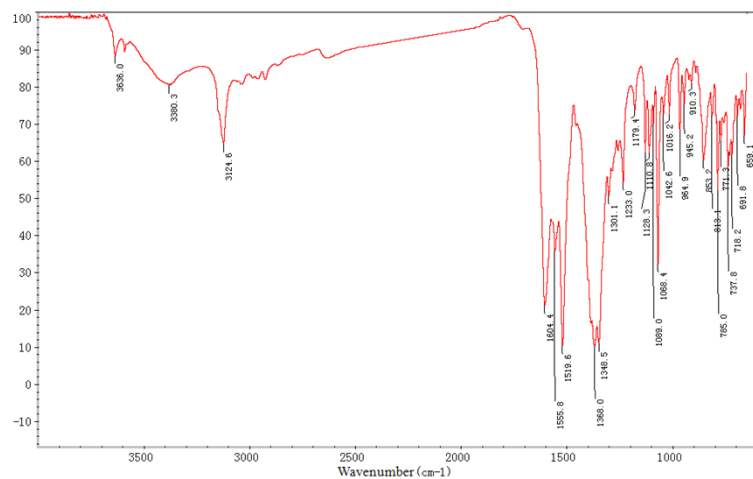

(d)

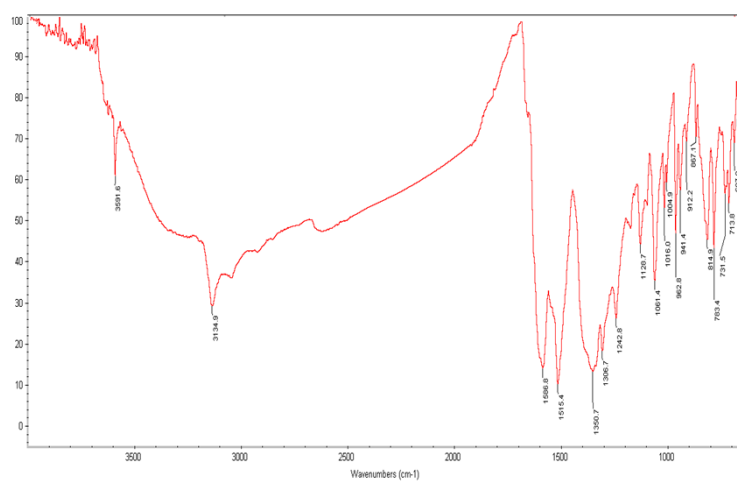

(e)

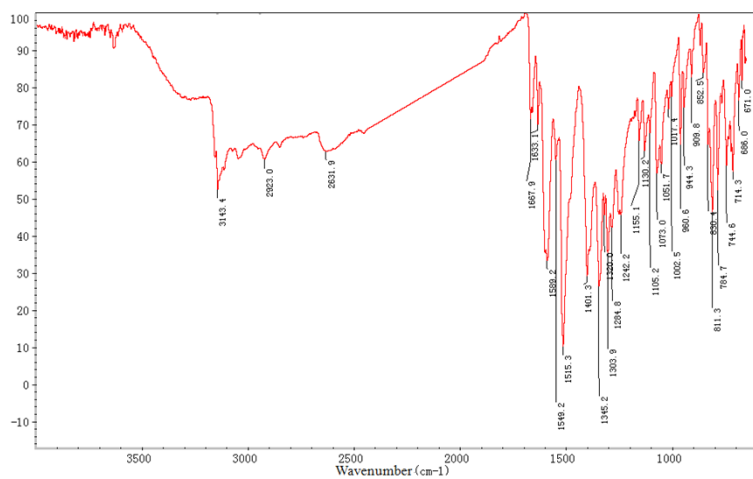

(f)

**Figure S2.** IR spectra of 1 (a), 2 (b), 3 (c), 4 (d), 5 (e), and 6 (f).

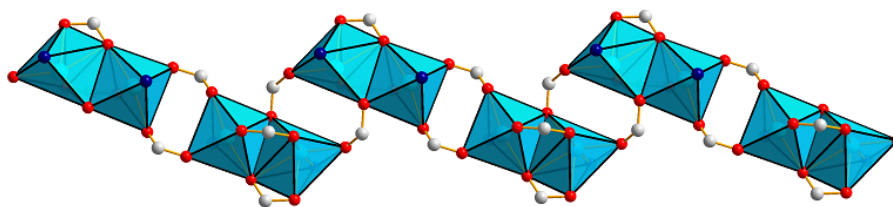

Figure S3. The  $[\text{Co}_4(\text{COO})_8]_n$  chain in complex 3.

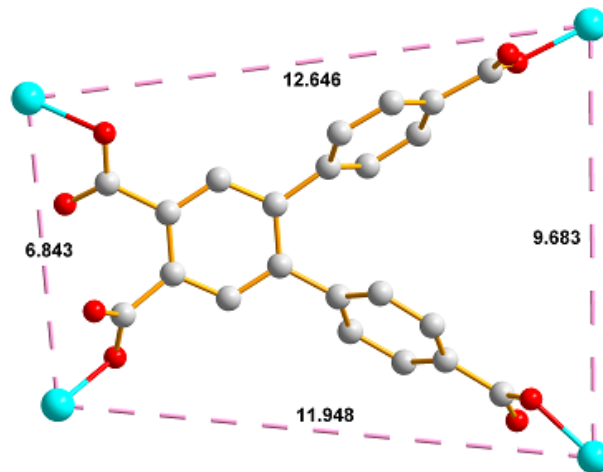

Figure S4. The  $\text{Co}\cdots\text{Co}$  distances separated by  $\text{DCP}^{4+}$  ligand in complex 4.

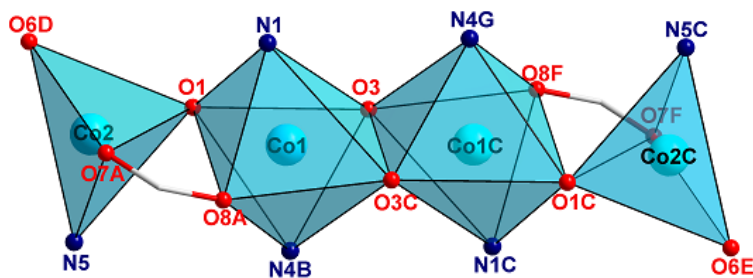

Figure S5. The  $\{\text{Co}_4\}$  cluster based SBUs in complex 6.

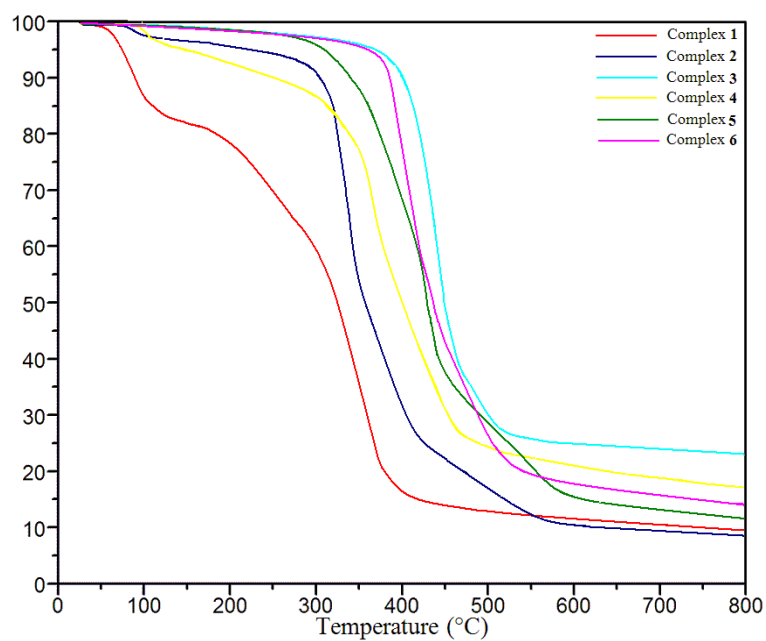

Figure S6. TG curves for complexes 1-6.

**Table S1** Selected bond lengths (Å) and angles (°) for **1** – 6.

|                                                                                                                               |            |                                              |            |                                              |            |                                              |            |
|-------------------------------------------------------------------------------------------------------------------------------|------------|----------------------------------------------|------------|----------------------------------------------|------------|----------------------------------------------|------------|
| <b>Complex 1</b>                                                                                                              |            |                                              |            |                                              |            |                                              |            |
| N(1)-Ni(1)                                                                                                                    | 2.067(5)   | N(3)-Ni(2)                                   | 2.080(5)   | N(5)-Ni(2)                                   | 2.075(6)   | Ni(2)-O(13)                                  | 2.065(2)   |
| Ni(1)-O(9)                                                                                                                    | 2.071(3)   | Ni(2)-O(12)                                  | 2.074(2)   | Ni(1)-O(1)                                   | 2.123(4)   | Ni(2)-O(10)                                  | 2.083(2)   |
| Ni(2)-O(11)                                                                                                                   | 2.050(2)   | N(1)-Ni(1)-O(9)                              | 87.51(17)  | N(1) <sup>#4</sup> -Ni(1)-O(1)               | 93.46(19)  | O(11)-Ni(1)-O(1)                             | 86.54(19)  |
| N(1)-Ni(1)-O(9) <sup>#4</sup>                                                                                                 | 92.49(17)  | O(9)-Ni(1)-O(1)                              | 94.84(14)  | O(11)-Ni(2)-O(13)                            | 88.81(8)   | O(11)-Ni(2)-O(12)                            | 175.10(12) |
| O(9) <sup>#4</sup> -Ni(1)-O(1)                                                                                                | 85.16(14)  | O(11)-Ni(2)-N(5)                             | 85.99(17)  | O(13)-Ni(2)-N(5)                             | 91.50(18)  | O(12)-Ni(2)-N(5)                             | 90.26(18)  |
| O(13)-Ni(2)-O(12)                                                                                                             | 88.13(8)   | O(13)-Ni(2)-N(3)                             | 89.66(17)  | O(12)-Ni(2)-N(3)                             | 91.71(17)  | N(5)-Ni(2)-N(3)                              | 177.7(2)   |
| O(11)-Ni(2)-N(3)                                                                                                              | 92.11(17)  | O(13)-Ni(2)-O(10)                            | 179.32(12) | O(12)-Ni(2)-O(10)                            | 92.14(8)   | N(5)-Ni(2)-O(10)                             | 87.88(19)  |
| O(11)-Ni(2)-O(10)                                                                                                             | 90.88(8)   | N(3)-Ni(2)-O(10)                             | 90.95(17)  |                                              |            |                                              |            |
| Symmetry codes: #4 -x, -y+1, -z+1.                                                                                            |            |                                              |            |                                              |            |                                              |            |
| <b>Complex 2</b>                                                                                                              |            |                                              |            |                                              |            |                                              |            |
| N(4)-Ni(1)                                                                                                                    | 2.081(2)   | N(5)-Ni(1)                                   | 2.077(2)   | N(7)-Ni(1)                                   | 2.093(2)   | Ni(1)-O(1)                                   | 2.0684(17) |
| Ni(1)-N(1) <sup>#4</sup>                                                                                                      | 2.098(2)   | Ni(1)-O(9)                                   | 2.1178(19) | O(1)-Ni(1)-N(5)                              | 84.10(8)   | O(1)-Ni(1)-N(4)                              | 176.93(8)  |
| N(5)-Ni(1)-N(4)                                                                                                               | 97.57(8)   | O(1)-Ni(1)-N(7)                              | 94.33(8)   | N(5)-Ni(1)-N(7)                              | 90.62(8)   | N(4)-Ni(1)-N(7)                              | 88.24(8)   |
| O(1)-Ni(1)-N(1) <sup>#4</sup>                                                                                                 | 88.48(8)   | N(5)-Ni(1)-N(1) <sup>#4</sup>                | 95.19(8)   | N(4)-Ni(1)-N(1) <sup>#4</sup>                | 88.80(8)   | N(7)-Ni(1)-N(1) <sup>#4</sup>                | 173.78(8)  |
| O(1)-Ni(1)-O(9)                                                                                                               | 84.86(7)   | N(5)-Ni(1)-O(9)                              | 168.22(8)  | N(4)-Ni(1)-O(9)                              | 93.64(8)   | N(7)-Ni(1)-O(9)                              | 86.10(9)   |
| N(1) <sup>#4</sup> -Ni(1)-O(9)                                                                                                | 88.63(9)   |                                              |            |                                              |            |                                              |            |
| Symmetry codes: #4 -x+3/2, y+1/2, -z+1/2.                                                                                     |            |                                              |            |                                              |            |                                              |            |
| <b>Complex 3</b>                                                                                                              |            |                                              |            |                                              |            |                                              |            |
| Co(1)-O(3)                                                                                                                    | 2.012(3)   | Co(1)-O(4) <sup>#1</sup>                     | 2.048(3)   | Co(1)-O(8) <sup>#2</sup>                     | 2.079(3)   | Co(1)-O(5) <sup>#3</sup>                     | 2.111(3)   |
| Co(1)-N(4) <sup>#4</sup>                                                                                                      | 2.138(3)   | Co(1)-O(1)                                   | 2.281(2)   | Co(2)-O(6) <sup>#3</sup>                     | 2.023(3)   | Co(2)-O(6) <sup>#5</sup>                     | 2.023(3)   |
| Co(2)-O(8) <sup>#2</sup>                                                                                                      | 2.338(3)   | Co(2)-O(1)                                   | 2.084(2)   | Co(2)-O(2) <sup>#5</sup>                     | 2.027(3)   | Co(2)-O(2) <sup>#5</sup>                     | 2.027(3)   |
| Co(2)-O(7) <sup>#2</sup>                                                                                                      | 2.162(3)   | Co(2)-N(1)                                   | 2.067(3)   | O(4) <sup>#1</sup> -Co(1)-O(8) <sup>#2</sup> | 96.29(11)  | O(4) <sup>#1</sup> -Co(1)-O(5) <sup>#3</sup> | 85.96(11)  |
| O(3)-Co(1)-O(8) <sup>#2</sup>                                                                                                 | 166.19(11) | O(3)-Co(1)-N(4) <sup>#4</sup>                | 93.58(12)  | O(3)-Co(1)-O(5) <sup>#3</sup>                | 85.93(11)  | O(8) <sup>#2</sup> -Co(1)-O(5) <sup>#3</sup> | 89.70(11)  |
| O(4) <sup>#1</sup> -Co(1)-N(4) <sup>#4</sup>                                                                                  | 98.03(12)  | O(5) <sup>#3</sup> -Co(1)-N(4) <sup>#4</sup> | 176.01(12) | O(8) <sup>#2</sup> -Co(1)-O(1)               | 83.22(9)   | N(4) <sup>#4</sup> -Co(1)-O(1)               | 83.44(11)  |
| O(8) <sup>#2</sup> -Co(1)-N(4) <sup>#4</sup>                                                                                  | 89.87(12)  | O(3)-Co(1)-O(1)                              | 83.89(9)   | O(5) <sup>#3</sup> -Co(1)-O(1)               | 92.57(10)  | O(3)-Co(1)-O(4) <sup>#1</sup>                | 96.47(11)  |
| O(4) <sup>#1</sup> -Co(1)-O(1)                                                                                                | 178.45(10) | O(6) <sup>#3</sup> -Co(2)-O(2) <sup>#5</sup> | 82.34(11)  | O(2) <sup>#5</sup> -Co(2)-O(1)               | 124.93(10) | O(2) <sup>#5</sup> -Co(2)-O(7) <sup>#2</sup> | 95.94(11)  |
| O(6) <sup>#3</sup> -Co(2)-N(1)                                                                                                | 168.77(12) | N(1)-Co(2)-O(1)                              | 93.48(11)  | N(1)-Co(2)-O(7) <sup>#2</sup>                | 93.54(13)  | O(6) <sup>#3</sup> -Co(2)-O(8) <sup>#2</sup> | 93.34(11)  |
| O(2) <sup>#5</sup> -Co(2)-N(1)                                                                                                | 86.44(12)  | O(6) <sup>#3</sup> -Co(2)-O(7) <sup>#2</sup> | 88.04(12)  | O(1)-Co(2)-O(7) <sup>#2</sup>                | 138.87(11) | O(2) <sup>#5</sup> -Co(2)-O(8) <sup>#2</sup> | 153.02(10) |
| O(6) <sup>#3</sup> -Co(2)-O(1)                                                                                                | 92.61(11)  | O(1)-Co(2)-O(8) <sup>#2</sup>                | 81.73(9)   | O(7) <sup>#2</sup> -Co(2)-O(8) <sup>#2</sup> | 57.20(10)  | N(1)-Co(2)-O(8) <sup>#2</sup>                | 96.86(11)  |
| Symmetry codes: #1 -x+1, -y+1, -z+2. #2 x+1/2, -y+3/2, z+1/2. #3 x, -y+1, z+1/2. #4 x+1/2, y-1/2, z. #5 -x+1/2, -y+3/2, -z+2. |            |                                              |            |                                              |            |                                              |            |
| <b>Complex 4</b>                                                                                                              |            |                                              |            |                                              |            |                                              |            |
| Co(1)-O(4) <sup>#2</sup>                                                                                                      | 1.944(5)   | Co(1)-N(1)                                   | 1.983(5)   | Co(2)-O(5) <sup>#3</sup>                     | 1.914(4)   | Co(2)-O(1)                                   | 1.980(4)   |
| Co(1)-N(5)                                                                                                                    | 1.981(5)   | Co(1)-O(3) <sup>#2</sup>                     | 2.383(6)   | Co(2)-N(8) <sup>#4</sup>                     | 1.949(5)   | Co(2)-N(4) <sup>#5</sup>                     | 1.998(5)   |
| O(7)-Co(1)-O(4) <sup>#2</sup>                                                                                                 | 111.0(2)   | O(4) <sup>#2</sup> -Co(1)-N(5)               | 123.18(18) | O(4) <sup>#2</sup> -Co(1)-N(1)               | 113.3(2)   | O(7)-Co(1)-O(3) <sup>#2</sup>                | 169.41(15) |
| O(7)-Co(1)-N(5)                                                                                                               | 104.4(2)   | O(7)-Co(1)-N(1)                              | 93.4(2)    | N(5)-Co(1)-N(1)                              | 107.2(2)   | O(4) <sup>#2</sup> -Co(1)-O(3) <sup>#2</sup> | 59.18(18)  |
| N(5)-Co(1)-O(3) <sup>#2</sup>                                                                                                 | 85.33(19)  | O(5) <sup>#3</sup> -Co(2)-N(8) <sup>#4</sup> | 128.19(17) | N(8) <sup>#4</sup> -Co(2)-O(1)               | 110.76(18) | N(8) <sup>#4</sup> -Co(2)-N(4) <sup>#5</sup> | 99.4(2)    |
| N(1)-Co(1)-O(3) <sup>#2</sup>                                                                                                 | 87.59(19)  | O(5) <sup>#3</sup> -Co(2)-O(1)               | 102.24(17) | O(5) <sup>#3</sup> -Co(2)-N(4) <sup>#5</sup> | 110.6(2)   | O(1)-Co(2)-N(4) <sup>#5</sup>                | 103.44(18) |
| Symmetry code: #2 x+1, -y+1/2, z+1/2. #3 x, -y+1/2, z-1/2. #4 x-1, y-1, z-1. #5 x, y-1, z.                                    |            |                                              |            |                                              |            |                                              |            |
| <b>Complex 5</b>                                                                                                              |            |                                              |            |                                              |            |                                              |            |
| Co(1)-O(2)                                                                                                                    | 1.994(2)   | Co(1)-O(8) <sup>#2</sup>                     | 2.045(2)   | Co(1)-N(1)                                   | 2.112(3)   | Co(1)-N(4) <sup>#3</sup>                     | 2.106(3)   |
| Co(1)-O(7) <sup>#1</sup>                                                                                                      | 2.031(2)   | O(2)-Co(1)-O(7) <sup>#1</sup>                | 103.03(11) | O(2)-Co(1)-N(4) <sup>#3</sup>                | 89.15(10)  | O(2)-Co(1)-N(1)                              | 84.20(10)  |
| O(8) <sup>#2</sup> -Co(1)-N(1)                                                                                                | 86.67(9)   | O(2)-Co(1)-O(8) <sup>#2</sup>                | 129.58(11) | O(7) <sup>#1</sup> -Co(1)-N(4) <sup>#3</sup> | 94.38(10)  | O(7) <sup>#1</sup> -Co(1)-N(1)               | 88.37(10)  |
| N(4) <sup>#3</sup> -Co(1)-N(1)                                                                                                | 173.23(10) | O(7) <sup>#1</sup> -Co(1)-O(8) <sup>#2</sup> | 126.17(10) | O(8) <sup>#2</sup> -Co(1)-N(4) <sup>#3</sup> | 96.64(10)  |                                              |            |
| Symmetry code: #1 -x, -y, -z+2. #2 x+1, y, z-1. #3 x-1, y-1, z.                                                               |            |                                              |            |                                              |            |                                              |            |
| <b>Complex 6</b>                                                                                                              |            |                                              |            |                                              |            |                                              |            |
| Co(1)-O(8) <sup>#1</sup>                                                                                                      | 2.088(2)   | Co(1)-N(4) <sup>#2</sup>                     | 2.118(3)   | Co(1)-O(3) <sup>#3</sup>                     | 2.192(2)   | Co(1)-O(1)                                   | 2.197(2)   |
| Co(1)-N(1)                                                                                                                    | 2.111(3)   | Co(1)-O(3)                                   | 2.166(2)   | Co(2)-O(7) <sup>#1</sup>                     | 1.976(2)   | Co(2)-O(1)                                   | 2.016(2)   |
| Co(2)-N(5)                                                                                                                    | 2.021(3)   | Co(2)-O(6) <sup>#4</sup>                     | 1.982(3)   | O(8) <sup>#1</sup> -Co(1)-N(1)               | 88.11(10)  | N(1)-Co(1)-N(4) <sup>#2</sup>                | 172.23(10) |
| N(1)-Co(1)-O(3)                                                                                                               | 101.38(9)  | N(4) <sup>#2</sup> -Co(1)-O(3)               | 85.37(9)   | O(8) <sup>#1</sup> -Co(1)-N(4) <sup>#2</sup> | 85.82(9)   | O(8) <sup>#1</sup> -Co(1)-O(3)               | 167.12(8)  |
| N(4) <sup>#2</sup> -Co(1)-O(3) <sup>#3</sup>                                                                                  | 85.76(9)   | O(3)-Co(1)-O(3) <sup>#3</sup>                | 79.08(8)   | N(4) <sup>#2</sup> -Co(1)-O(1)               | 91.45(9)   | O(3) <sup>#3</sup> -Co(1)-O(1)               | 170.49(8)  |
| O(8) <sup>#1</sup> -Co(1)-O(3) <sup>#3</sup>                                                                                  | 90.90(8)   | O(8) <sup>#1</sup> -Co(1)-O(1)               | 97.97(8)   | O(3)-Co(1)-O(1)                              | 91.64(8)   | N(1)-Co(1)-O(1)                              | 84.58(9)   |
| N(1)-Co(1)-O(3) <sup>#3</sup>                                                                                                 | 99.20(9)   | O(7) <sup>#1</sup> -Co(2)-O(6) <sup>#4</sup> | 97.37(11)  | O(6) <sup>#4</sup> -Co(2)-O(1)               | 109.43(10) | O(6) <sup>#4</sup> -Co(2)-N(5)               | 136.63(13) |
| O(7) <sup>#1</sup> -Co(2)-O(1)                                                                                                | 106.13(10) | O(7) <sup>#1</sup> -Co(2)-N(5)               | 98.76(11)  | O(1)-Co(2)-N(5)                              | 104.21(10) |                                              |            |
| Symmetry code: #1 x, -y+1, z+1/2. #2 x-1/2, y+1/2, z. #3 -x+1, -y+1, -z+1. #4 -x+3/2, -y+3/2, -z+1.                           |            |                                              |            |                                              |            |                                              |            |
